# Supplementary material for: Synthesis and Antitumor Activity Evaluation of Novel Echinatin Derivatives with a 1,3,4-Oxadiazole Moiety
Source: MDPI journal article supplement (doi:10.3390/ijms25042254), 2024-02-13
Supplement: s1 [file s1]

## Supporting Information

### Reverse docking

The protein structure data utilized in this study were sourced from the PDBbind database, comprising a total of 17654 entries. Reverse docking was executed using Glide Dock, a specialized docking program developed by Schrödinger. The resulting analysis identified the top 50 structures, ranked based on their highest docking scores, as outlined below:

**Table S1** Top 50 docking score of reverse docking.

| Num. | PDB  | Docking score | Num. | PDB  | Docking score |
|------|------|---------------|------|------|---------------|
| 1    | 5flj | -16.97        | 26   | 4ckr | -13.54        |
| 2    | 5mym | -15.97        | 27   | 1fm9 | -13.52        |
| 3    | 5ioy | -15.82        | 28   | 5vqx | -13.52        |
| 4    | 4csj | -15.35        | 29   | 5vqt | -13.50        |
| 5    | 3hfj | -14.61        | 30   | 3are | -13.49        |
| 6    | 4hvs | -14.60        | 31   | 2hz0 | -13.48        |
| 7    | 3mlb | -14.49        | 32   | 5m7m | -13.43        |
| 8    | 5ipa | -14.41        | 33   | 2og8 | -13.42        |
| 9    | 4m3e | -13.86        | 34   | 3ctq | -13.41        |
| 10   | 3n7h | -13.80        | 35   | 4m3f | -13.41        |
| 11   | 4ymj | -13.79        | 36   | 5q15 | -13.39        |
| 12   | 3k22 | -13.79        | 37   | 4m3d | -13.34        |
| 13   | 5ezh | -13.79        | 38   | 5vqq | -13.32        |
| 14   | 3g08 | -13.76        | 39   | 4dlj | -13.29        |
| 15   | 4pms | -13.71        | 40   | 5f04 | -13.27        |
| 16   | 6c0n | -13.71        | 41   | 4m3b | -13.24        |
| 17   | 3k84 | -13.67        | 42   | 3fun | -13.19        |
| 18   | 6fni | -13.66        | 43   | 2vj8 | -13.18        |
| 19   | 5f0h | -13.66        | 44   | 4at4 | -13.18        |
| 20   | 2ofv | -13.64        | 45   | 4omk | -13.16        |
| 21   | 3qri | -13.62        | 46   | 5yqo | -13.15        |
| 22   | 4ono | -13.59        | 47   | 5vqr | -13.14        |
| 23   | 4mxc | -13.57        | 48   | 3ftz | -13.14        |
| 24   | 5mo8 | -13.56        | 49   | 4i5h | -13.13        |
| 25   | 4ckr | -13.54        | 50   | 3ugc | -13.13        |

# <sup>1</sup>H, <sup>13</sup>C NMR and HRMS spectra

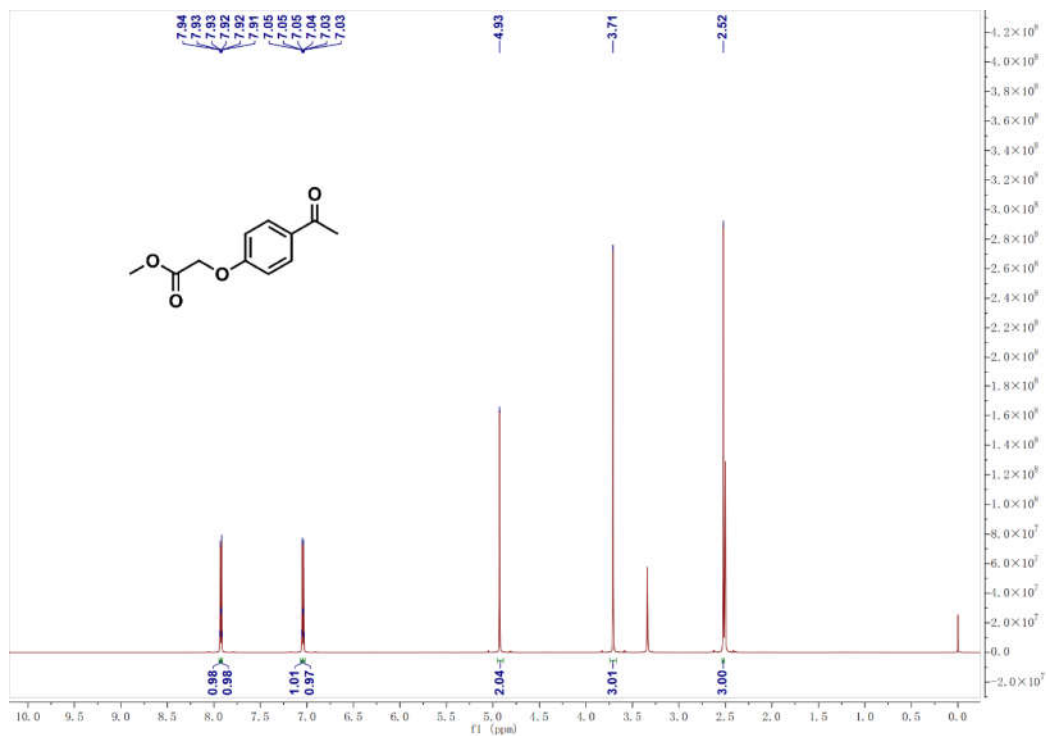

Figure S1. <sup>1</sup>H NMR (600 MHz, DMSO-*d*<sub>6</sub>) spectrum of compound 1

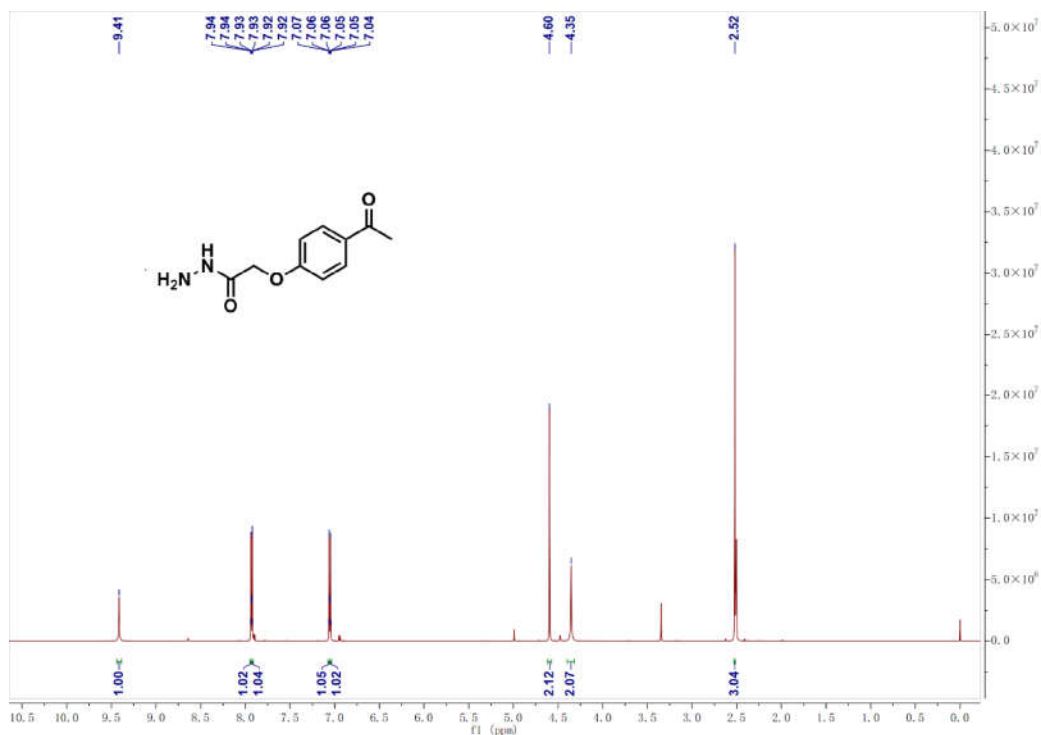

Figure S2. <sup>1</sup>H NMR (600 MHz, DMSO-*d*<sub>6</sub>) spectrum of compound 2

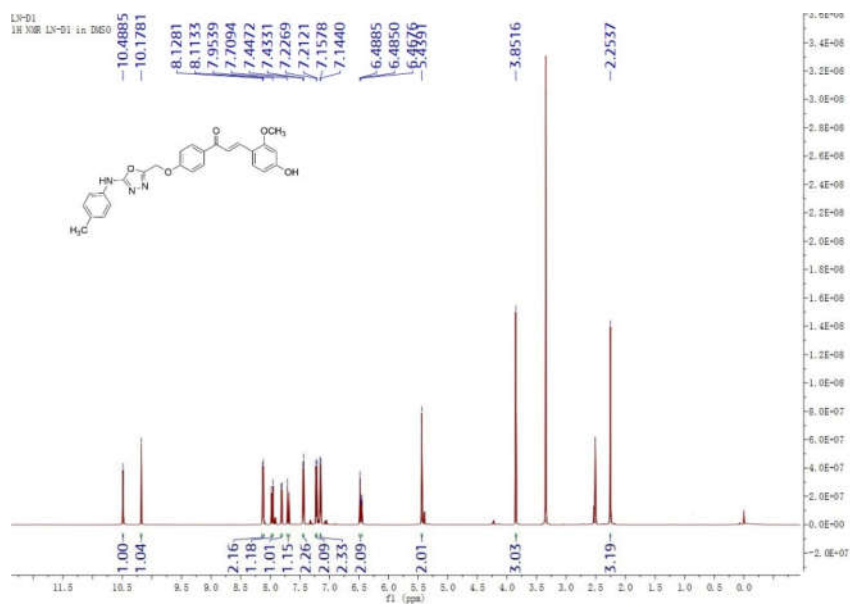

**Figure S3.**  $^1\text{H}$  NMR (600 MHz,  $\text{DMSO}-d_6$ ) spectrum of compound T1

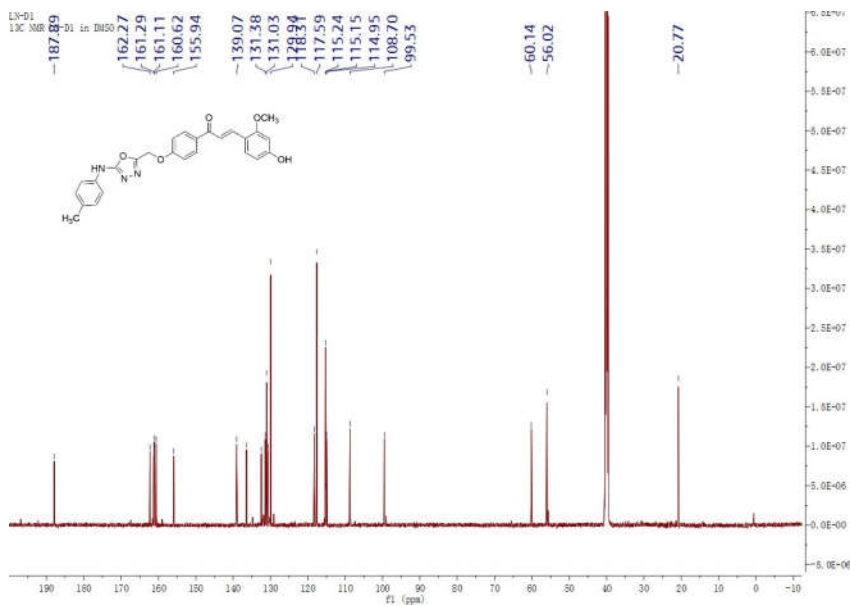

**Figure S4.**  $^{13}\text{C}$  NMR (150 MHz,  $\text{DMSO}-d_6$ ) spectrum of compound T1

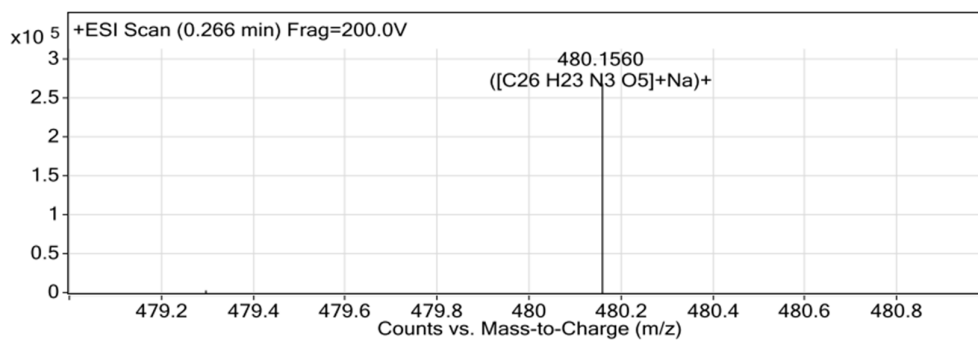

Figure S5. Mass spectrum of compound T1

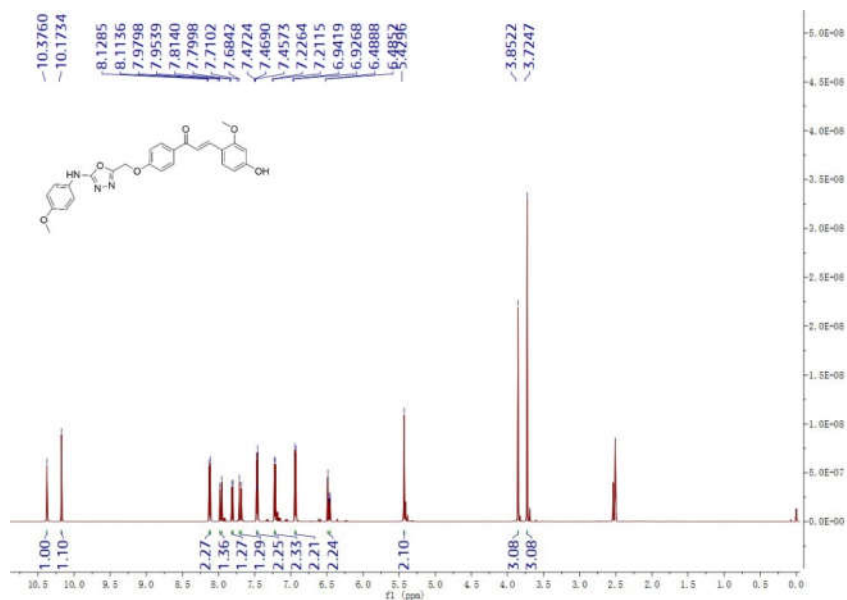

Figure S6. <sup>1</sup>H NMR (600 MHz, DMSO-*d*<sub>6</sub>) spectrum of compound T2

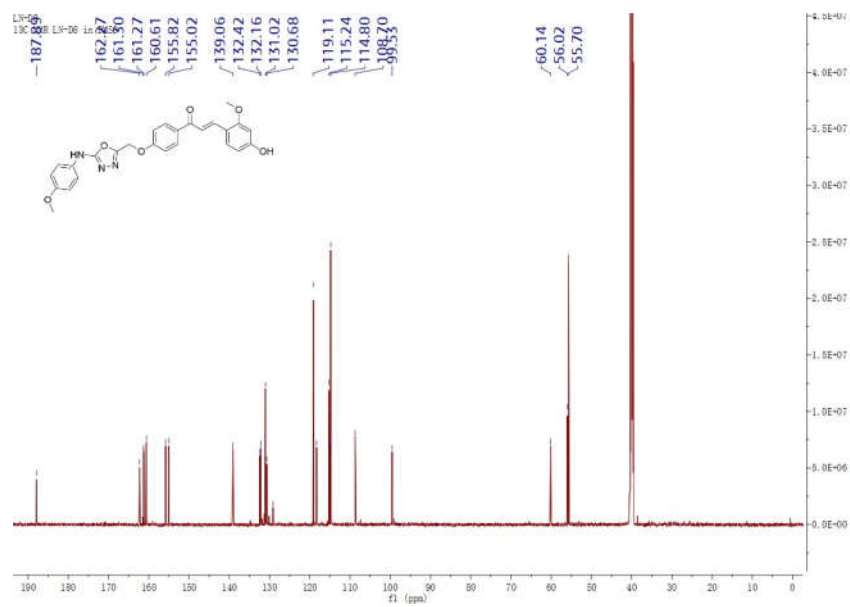

Figure S7. <sup>13</sup>C NMR (150 MHz, DMSO-*d*<sub>6</sub>) spectrum of compound T2

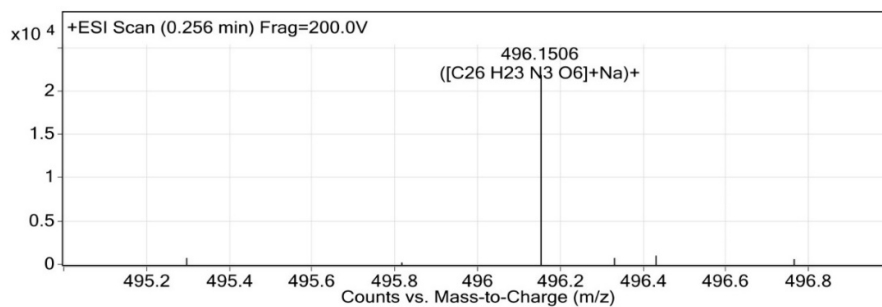

Figure S8. Mass spectrum of compound T2

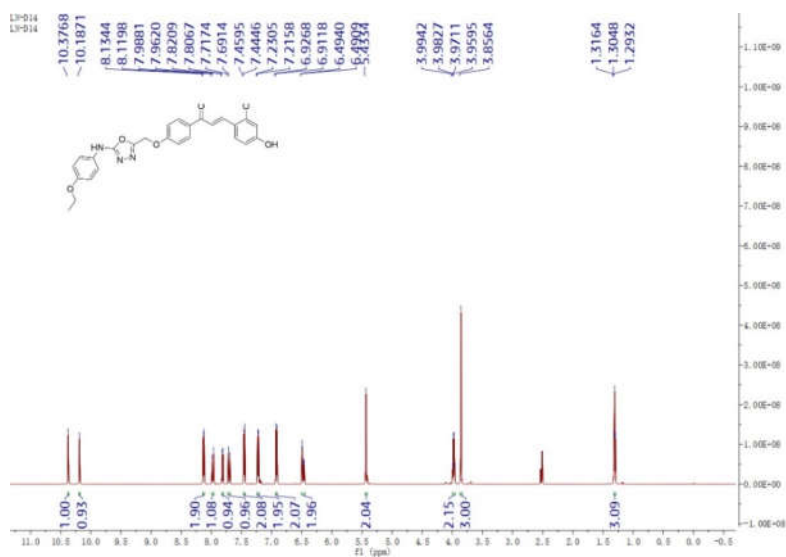

Figure S9. <sup>1</sup>H NMR (600 MHz, DMSO-*d*<sub>6</sub>) spectrum of compound T3

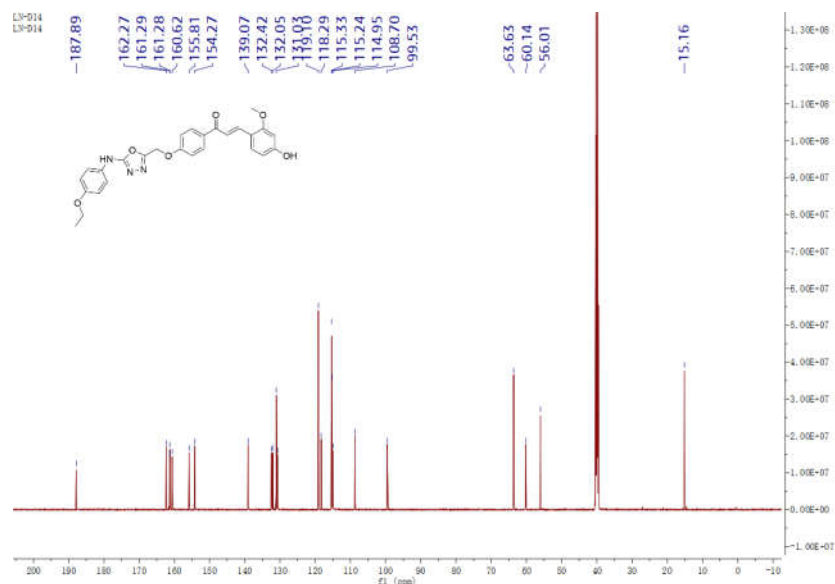

Figure S10. <sup>13</sup>C NMR (150 MHz, DMSO-*d*<sub>6</sub>) spectrum of compound T3

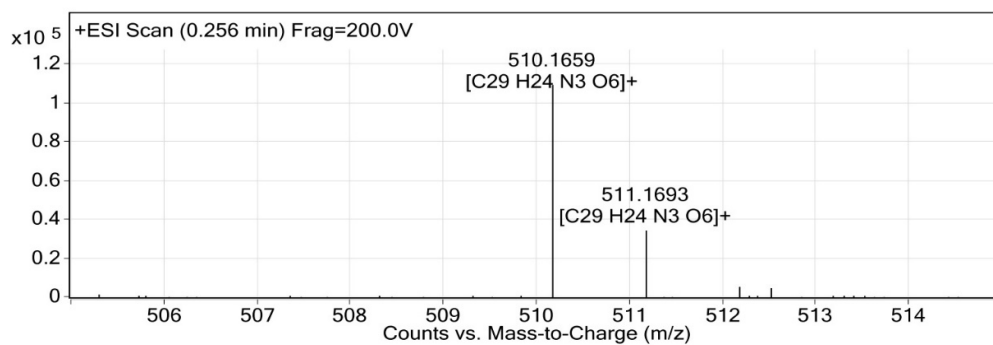

Figure S11. Mass spectrum of compound T3

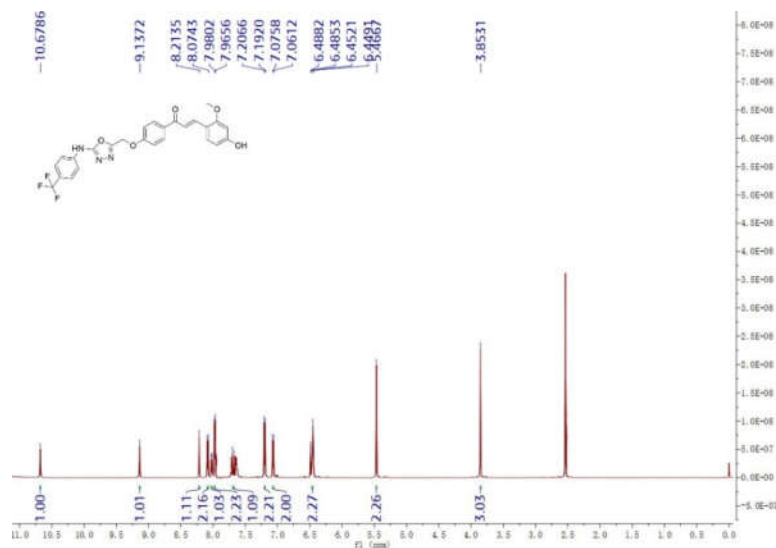

Figure S12. <sup>1</sup>H NMR (600 MHz, DMSO-*d*<sub>6</sub>) spectrum of compound T4

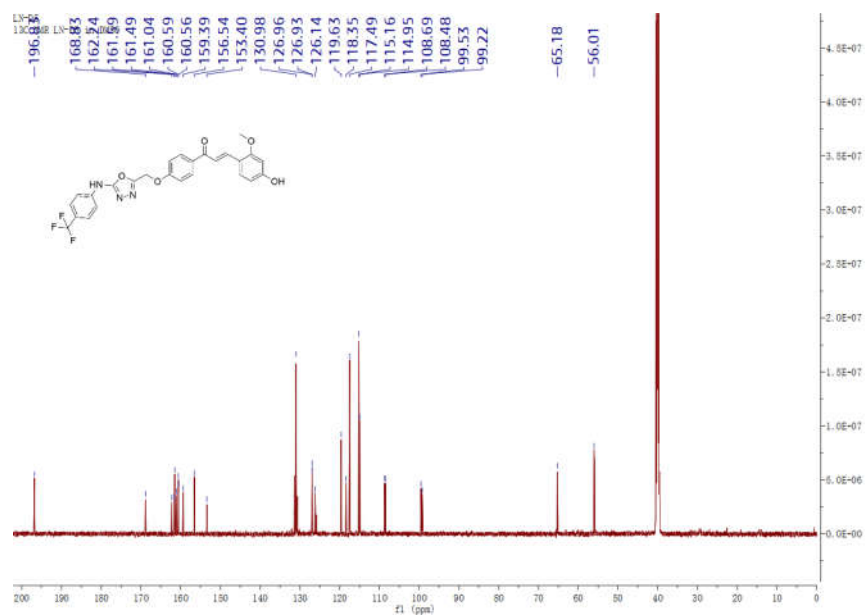

**Figure S13.** <sup>13</sup>C NMR (150 MHz, DMSO-*d*<sub>6</sub>) spectrum of compound T4

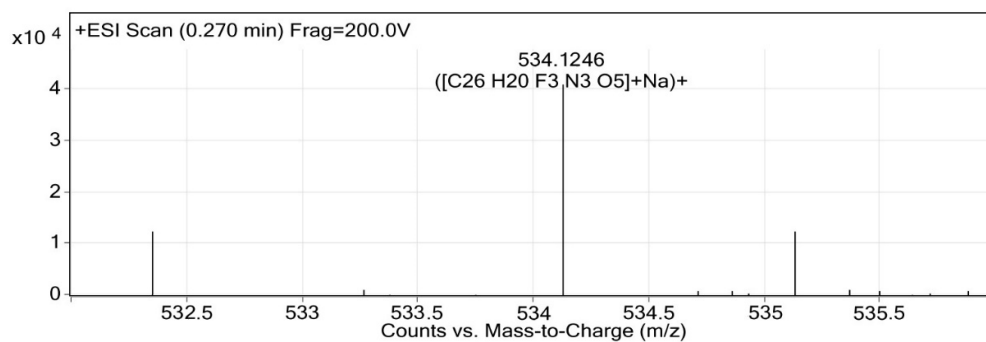

**Figure S14.** Mass spectrum of compound T4

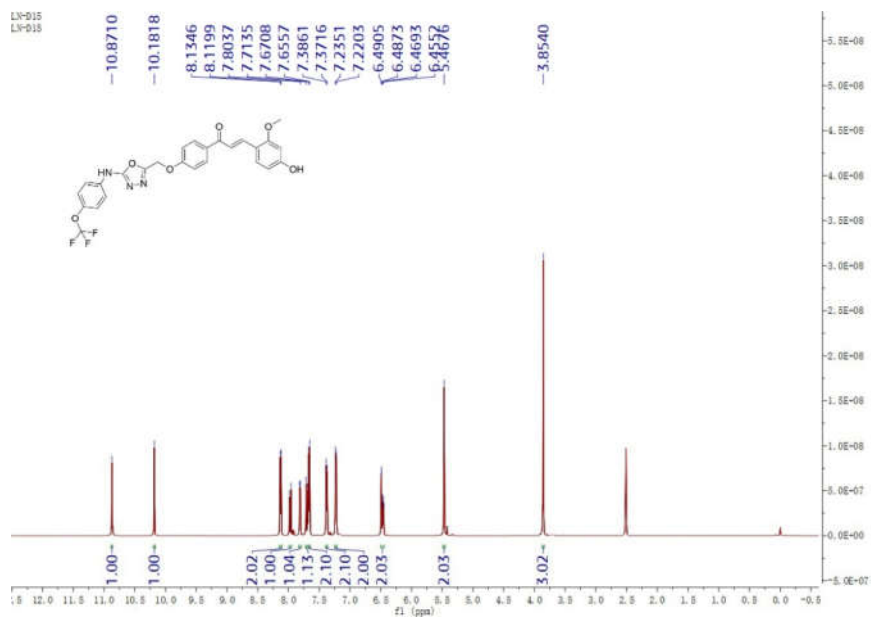

**Figure S15.**  $^1\text{H}$  NMR (600 MHz,  $\text{DMSO-}d_6$ ) spectrum of compound T5

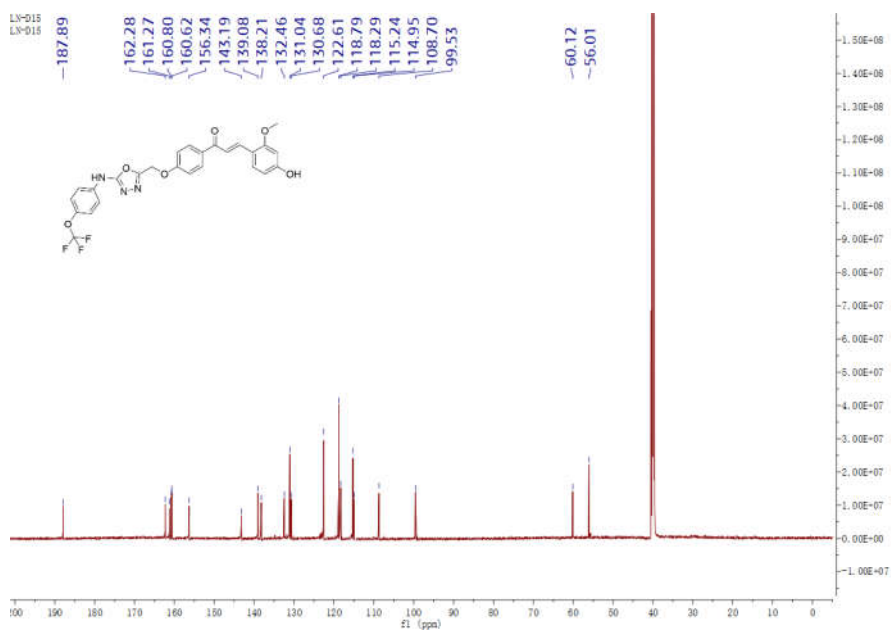

**Figure S16.**  $^{13}\text{C}$  NMR (150 MHz,  $\text{DMSO-}d_6$ ) spectrum of compound T5

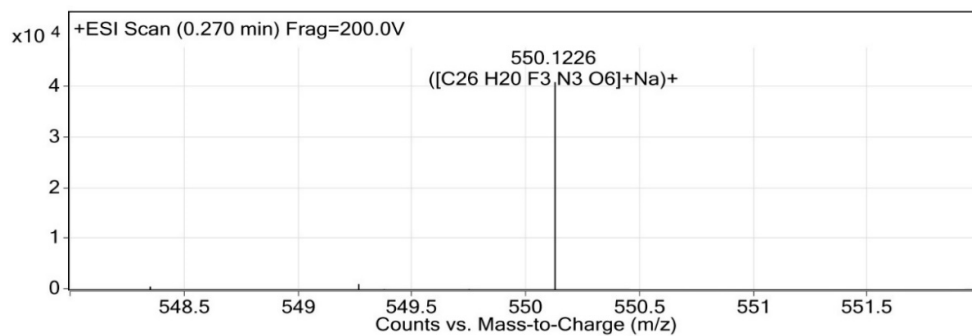

Figure S17. Mass spectrum of compound T5

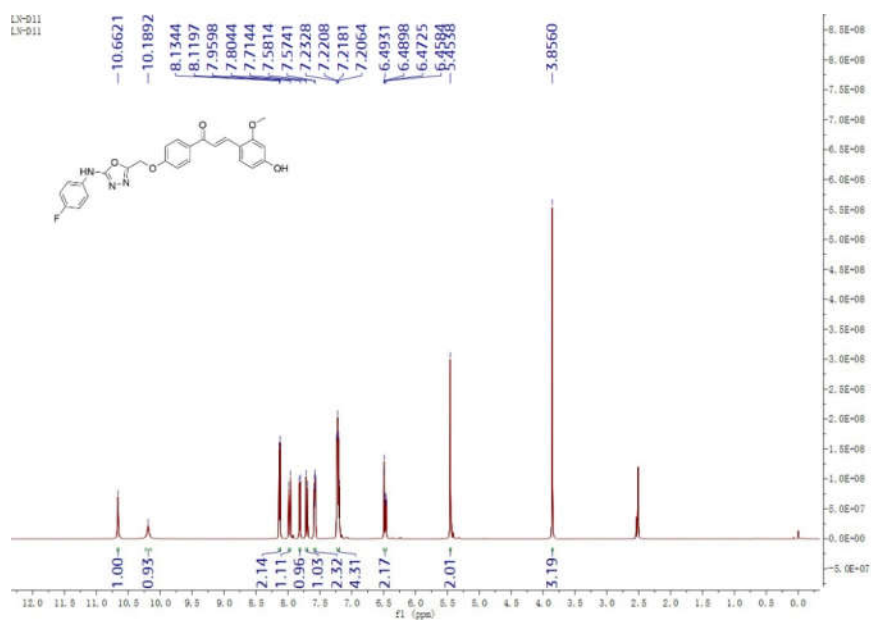

Figure S18. <sup>1</sup>H NMR (600 MHz, DMSO-*d*<sub>6</sub>) spectrum of compound T6

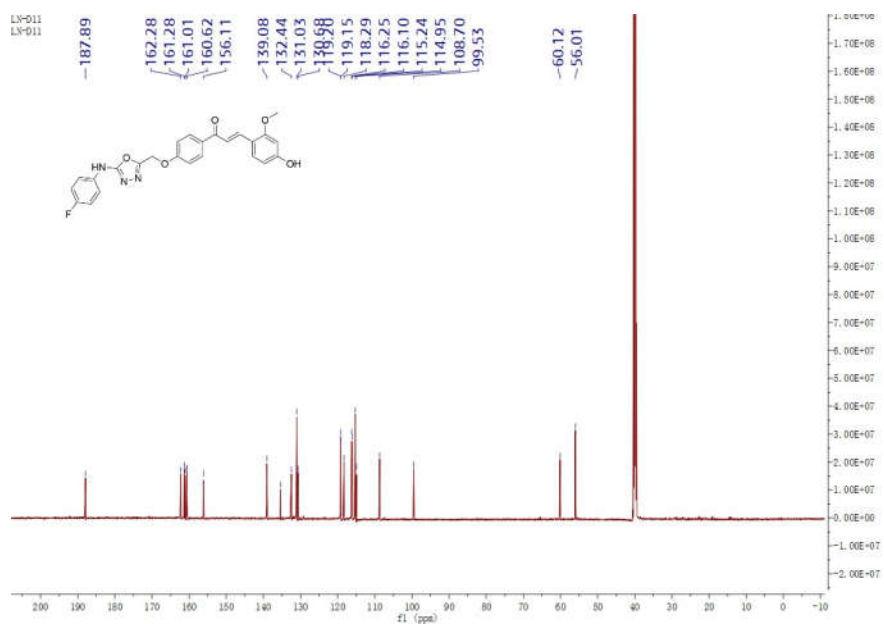

**Figure S19.** <sup>13</sup>C NMR (150 MHz, DMSO-*d*<sub>6</sub>) spectrum of compound T6

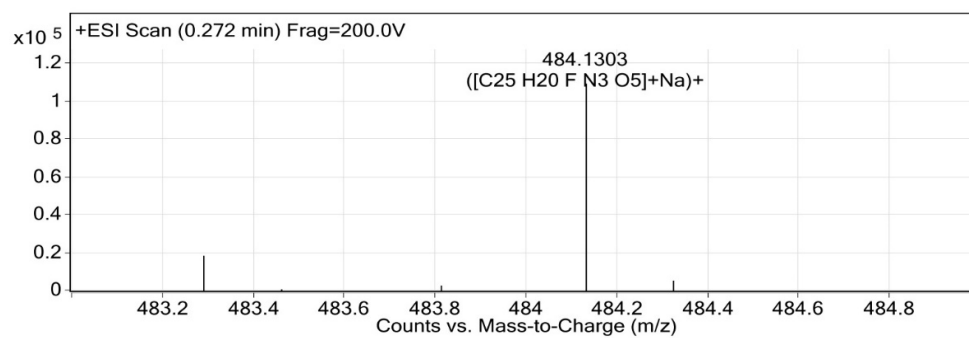

**Figure S20.** Mass spectrum of compound T6

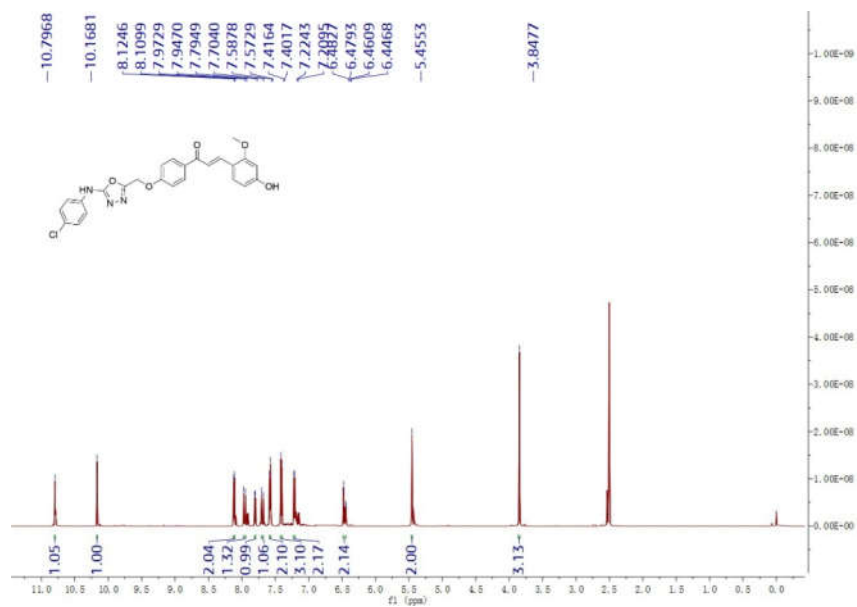

Figure S21. <sup>1</sup>H NMR (600 MHz, DMSO-*d*<sub>6</sub>) spectrum of compound T7

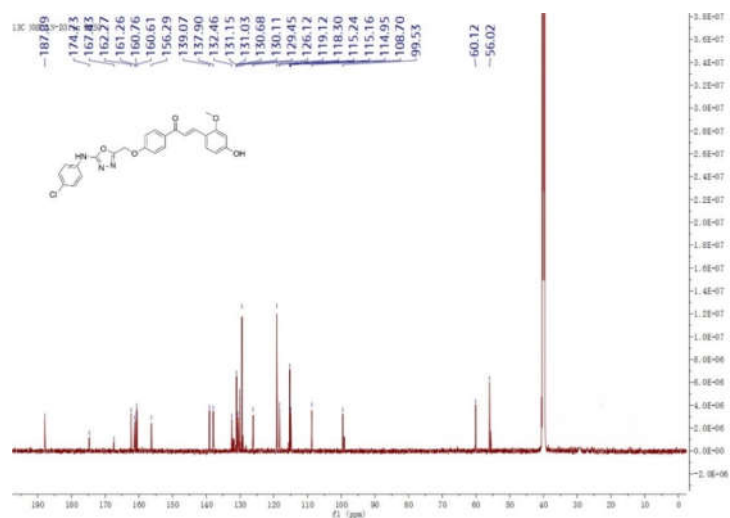

Figure S22. <sup>13</sup>C NMR (150 MHz, DMSO-*d*<sub>6</sub>) spectrum of compound T7

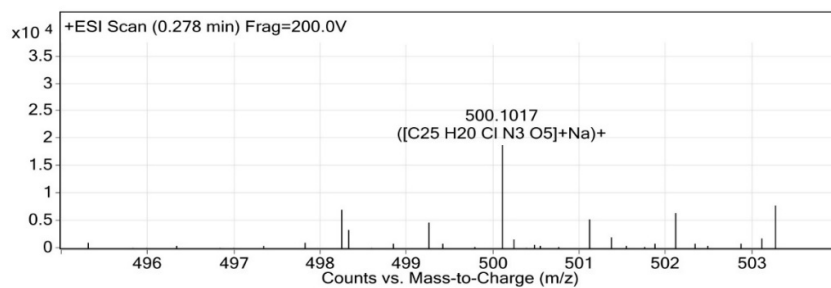

Figure S23. Mass spectrum of compound T7

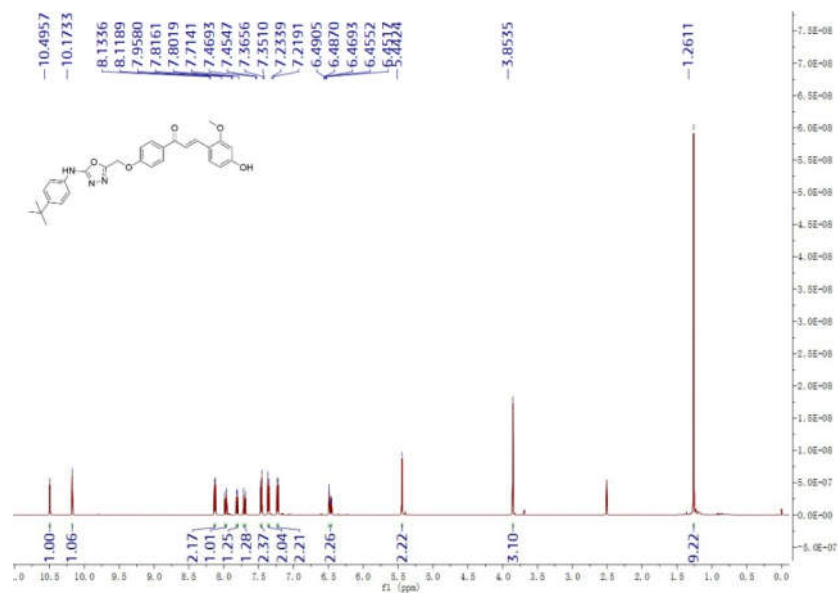

Figure S24.  $^1\text{H}$  NMR (600 MHz,  $\text{DMSO}-d_6$ ) spectrum of compound T8

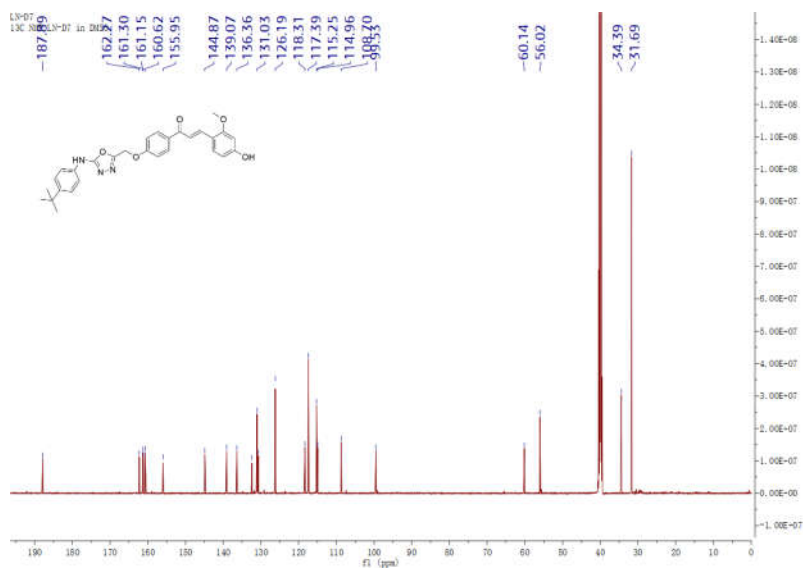

Figure S25.  $^{13}\text{C}$  NMR (150 MHz,  $\text{DMSO}-d_6$ ) spectrum of compound T8

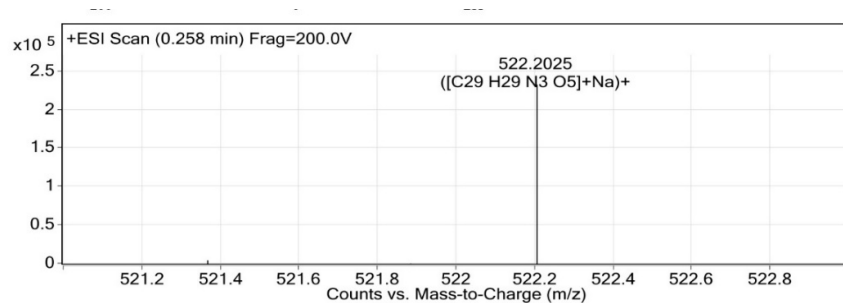

Figure S26. Mass spectrum of compound T8

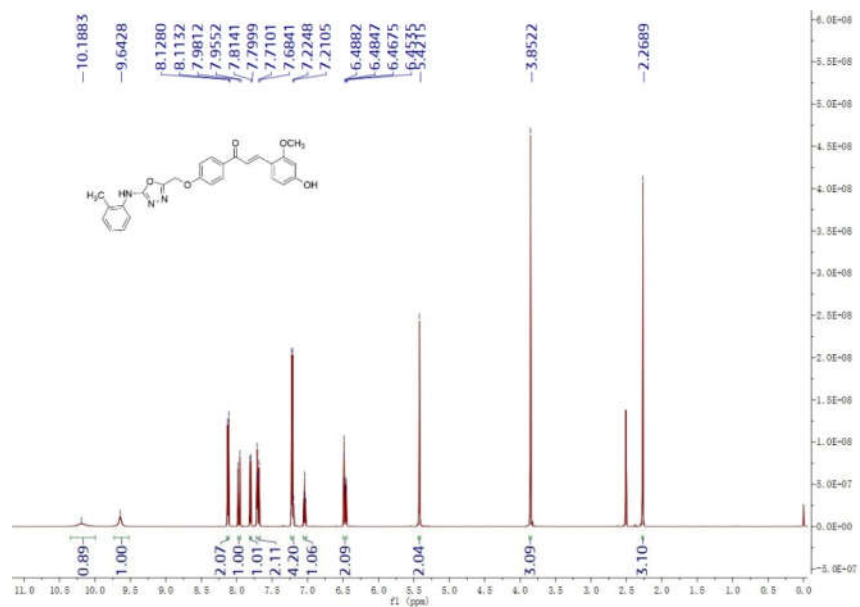

**Figure S27.** <sup>1</sup>H NMR (600 MHz, DMSO-*d*<sub>6</sub>) spectrum of compound T9

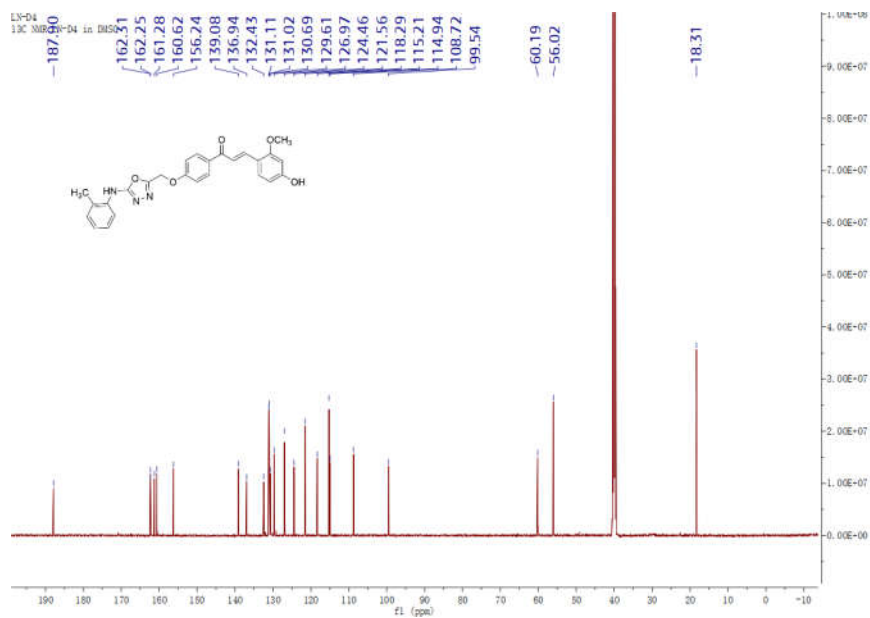

**Figure S28.** <sup>13</sup>C NMR (150 MHz, DMSO-*d*<sub>6</sub>) spectrum of compound T9

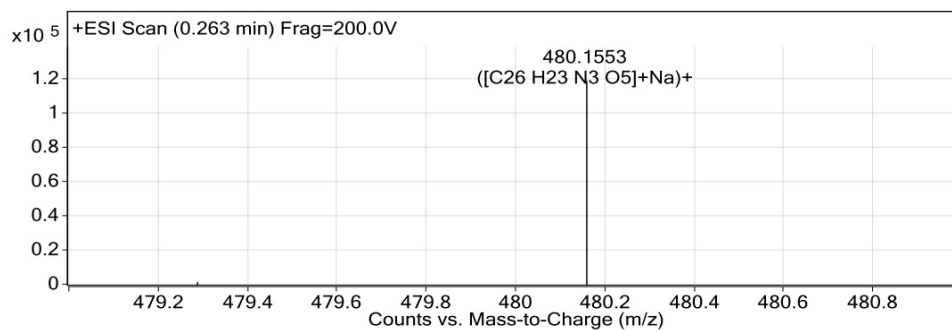

Figure S29. Mass spectrum of compound T9

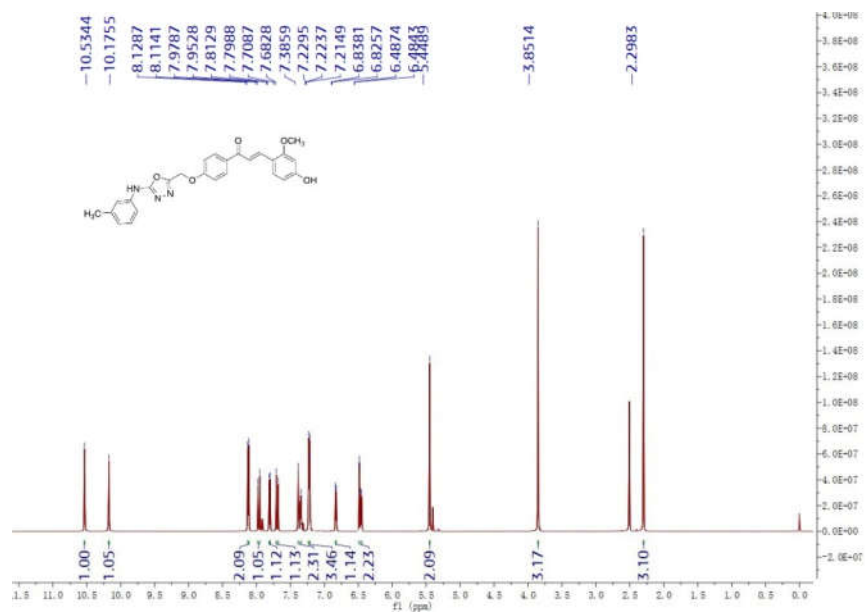

Figure S30. <sup>1</sup>H NMR (600 MHz, DMSO-*d*<sub>6</sub>) spectrum of compound T10

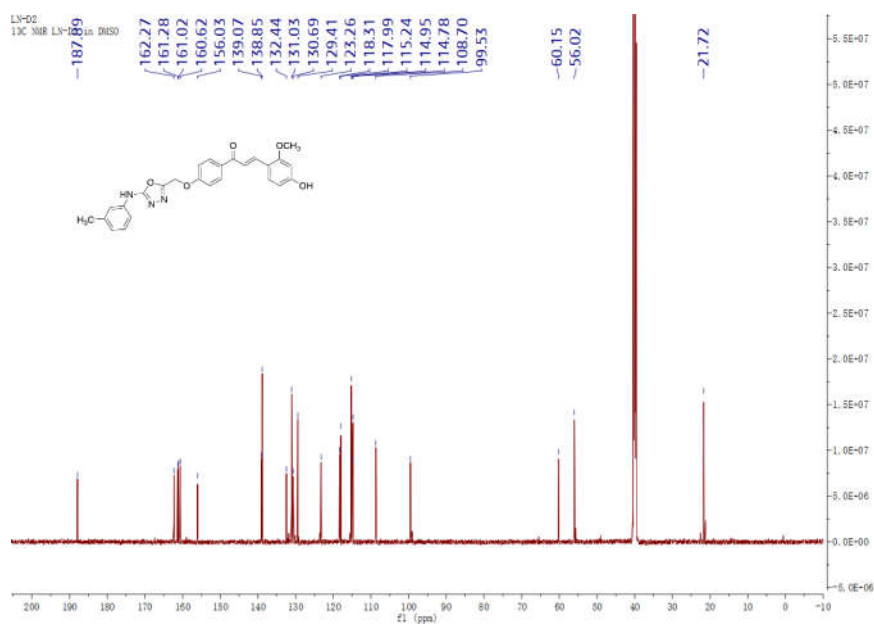

Figure S31. <sup>13</sup>C NMR (150 MHz, DMSO-*d*<sub>6</sub>) spectrum of compound T10

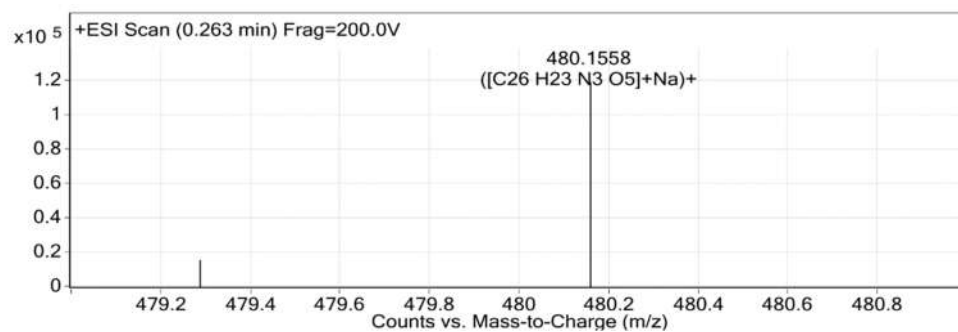

Figure S32. Mass spectrum of compound T10

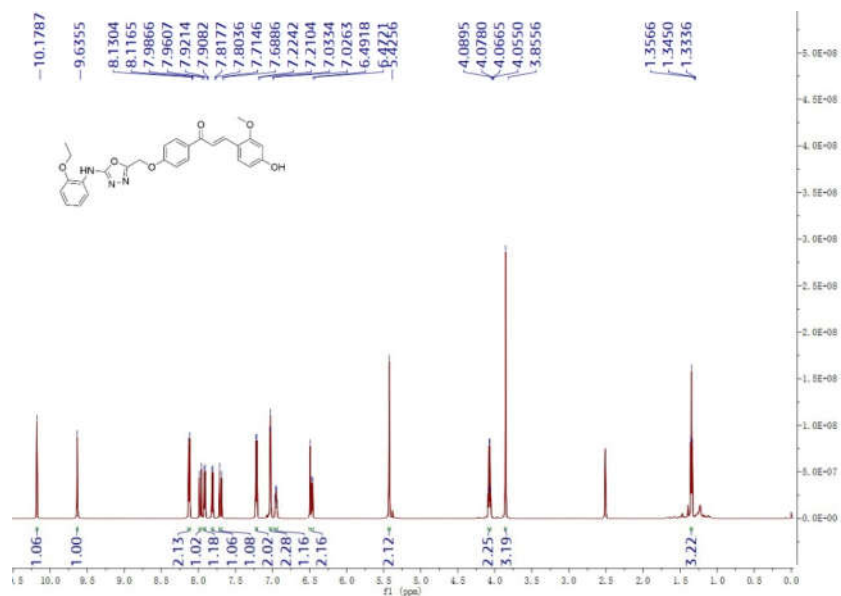

Figure S33.  $^1\text{H}$  NMR (600 MHz,  $\text{DMSO}-d_6$ ) spectrum of compound T11

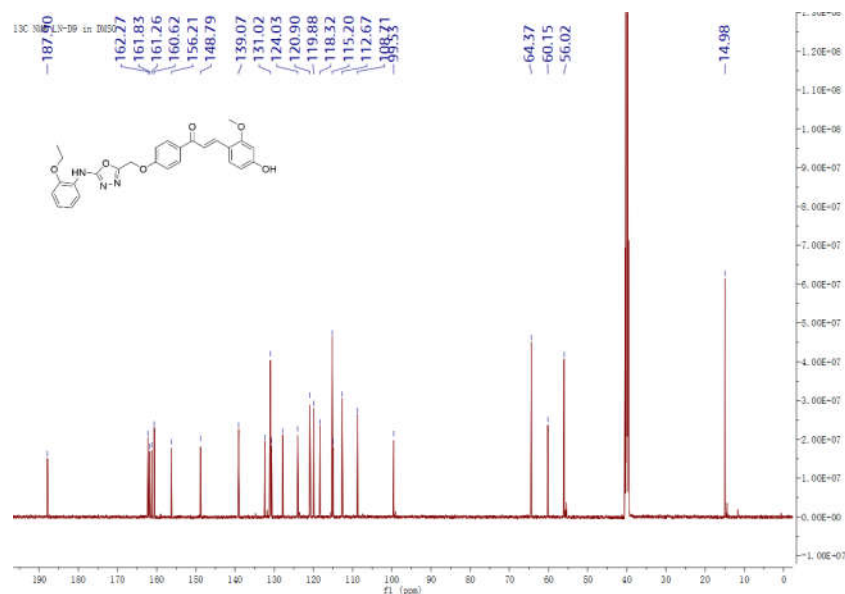

Figure S34.  $^{13}\text{C}$  NMR (150 MHz,  $\text{DMSO}-d_6$ ) spectrum of compound T11

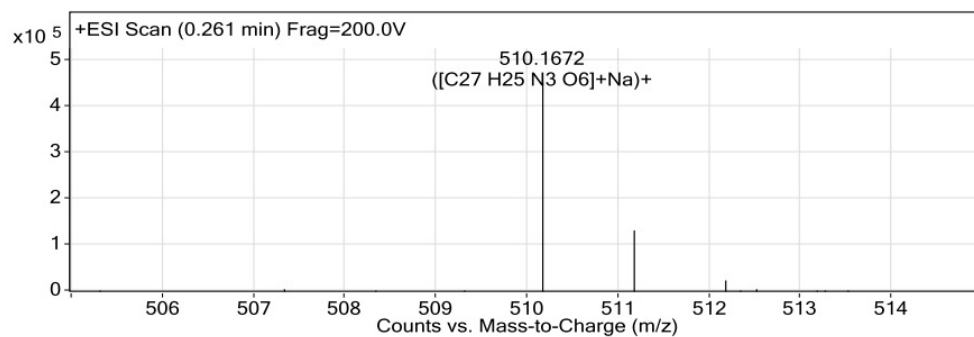

Figure S35. Mass spectrum of compound T11

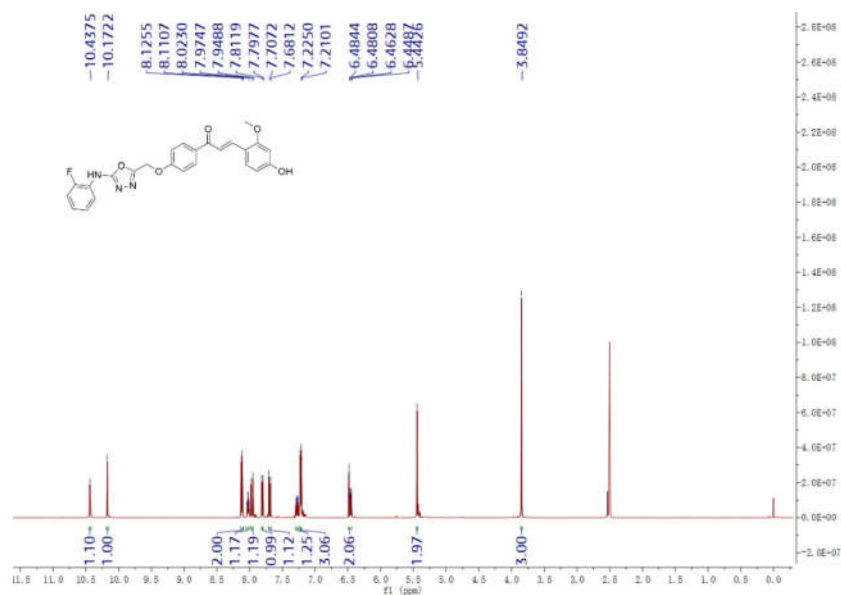

Figure S36.  $^1\text{H}$  NMR (600 MHz,  $\text{DMSO}-d_6$ ) spectrum of compound T12

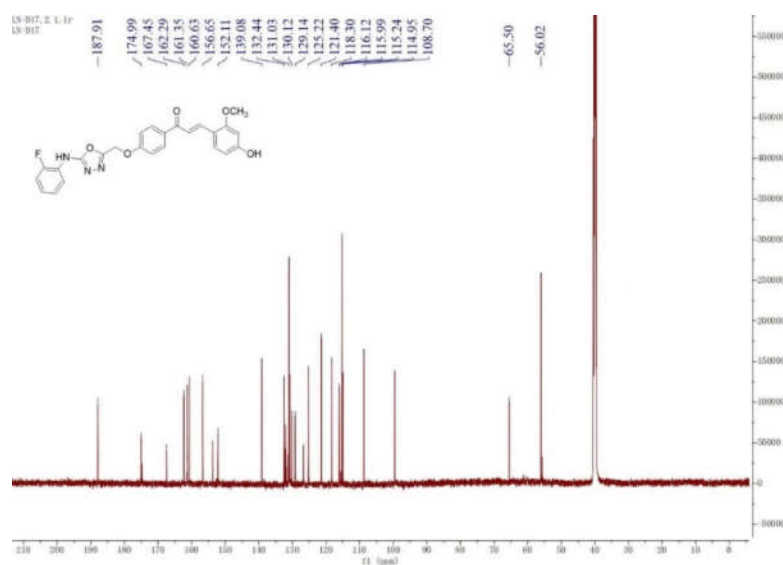

Figure S37.  $^{13}\text{C}$  NMR (150 MHz,  $\text{DMSO}-d_6$ ) spectrum of compound T12

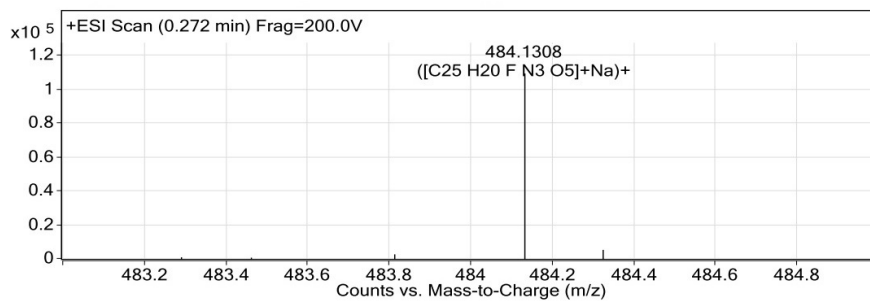

Figure S38. Mass spectrum of compound T12

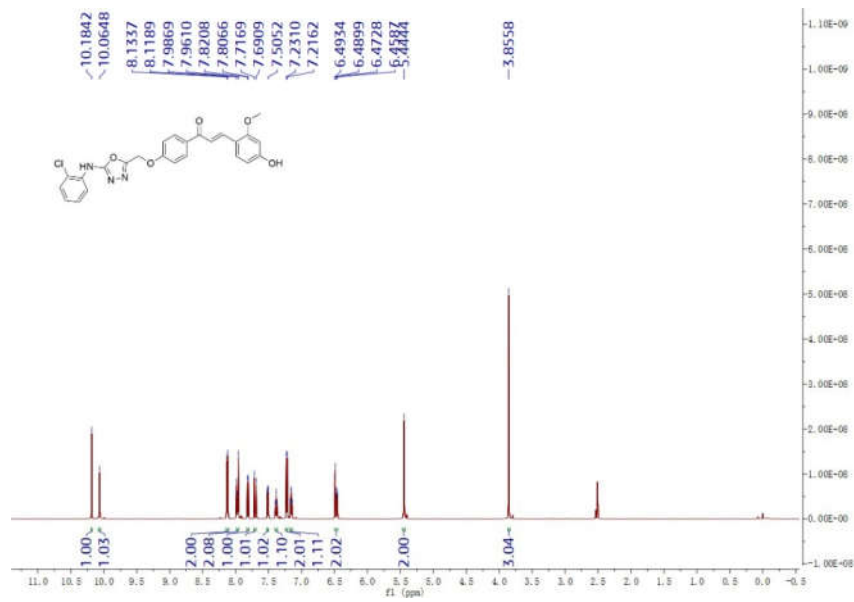

**Figure S39.** <sup>1</sup>H NMR (600 MHz, DMSO-*d*<sub>6</sub>) spectrum of compound T13

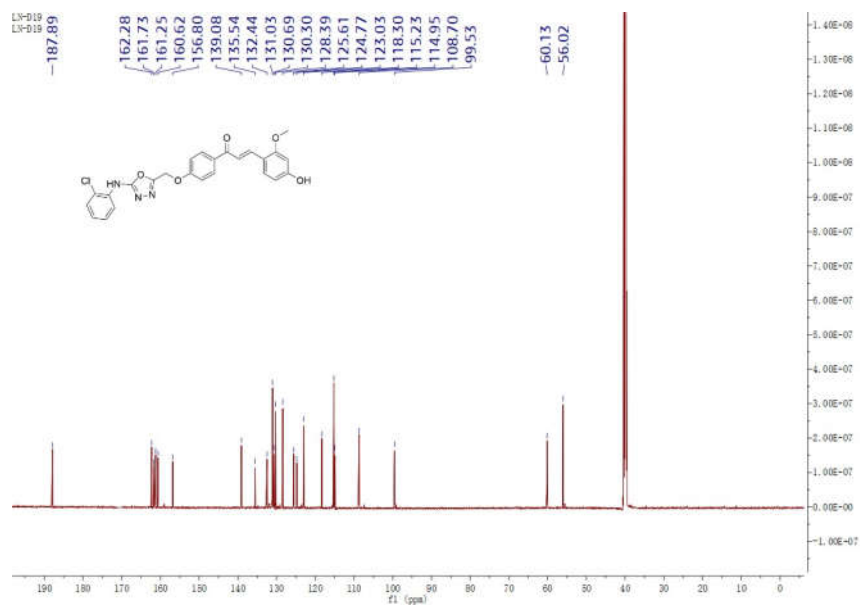

**Figure S40.** <sup>13</sup>C NMR (150 MHz, DMSO-*d*<sub>6</sub>) spectrum of compound T13

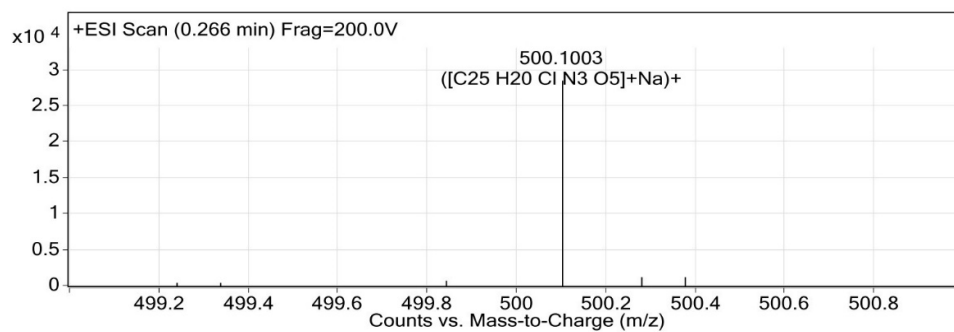

Figure S41. Mass spectrum of compound T13

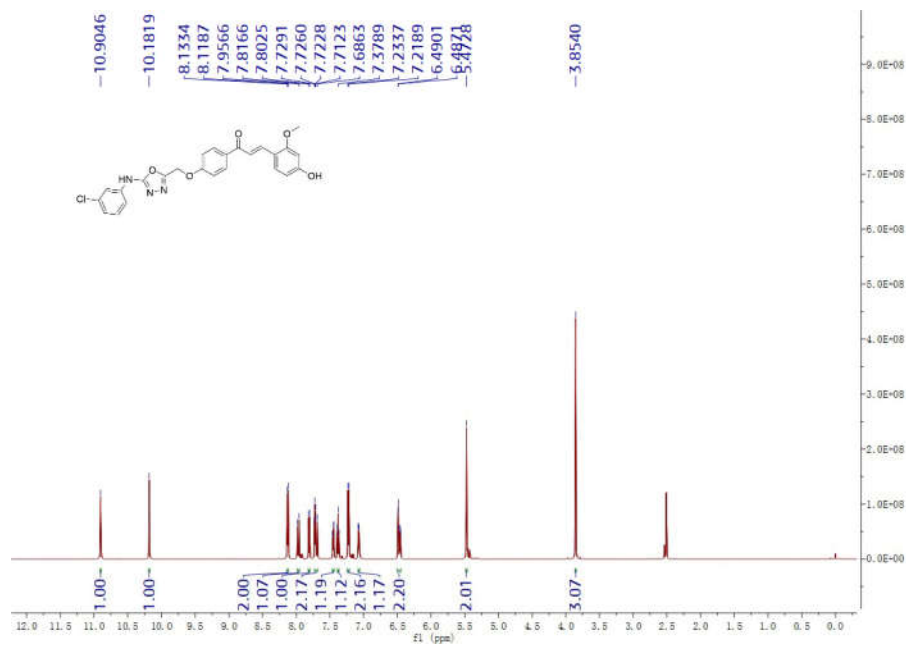

Figure S42. <sup>1</sup>H NMR (600 MHz, DMSO-*d*<sub>6</sub>) spectrum of compound T14

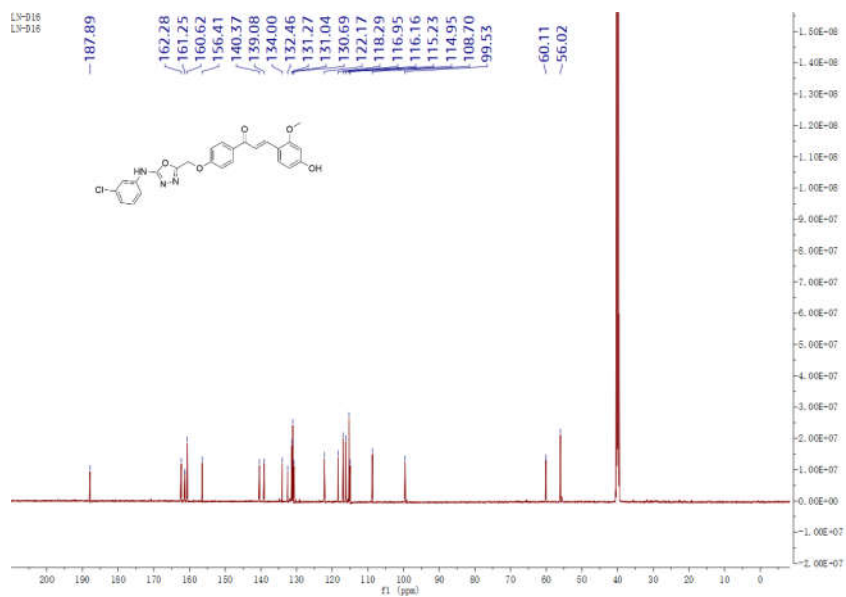

Figure S43. <sup>13</sup>C NMR (150 MHz, DMSO-*d*<sub>6</sub>) spectrum of compound T14

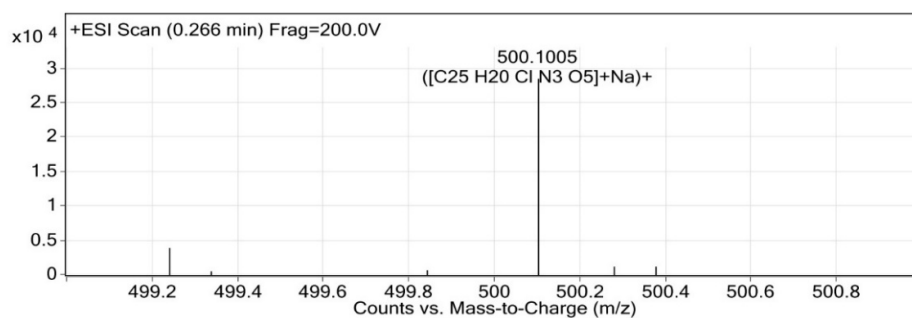

Figure S44. Mass spectrum of compound T14

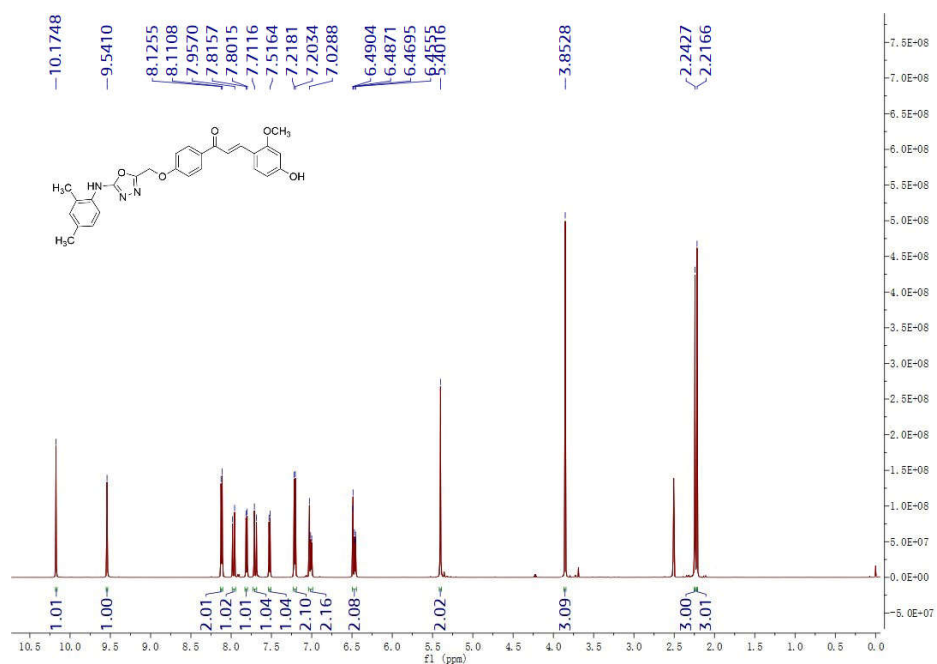

Figure S45. <sup>1</sup>H NMR (600 MHz, DMSO-*d*<sub>6</sub>) spectrum of compound T15

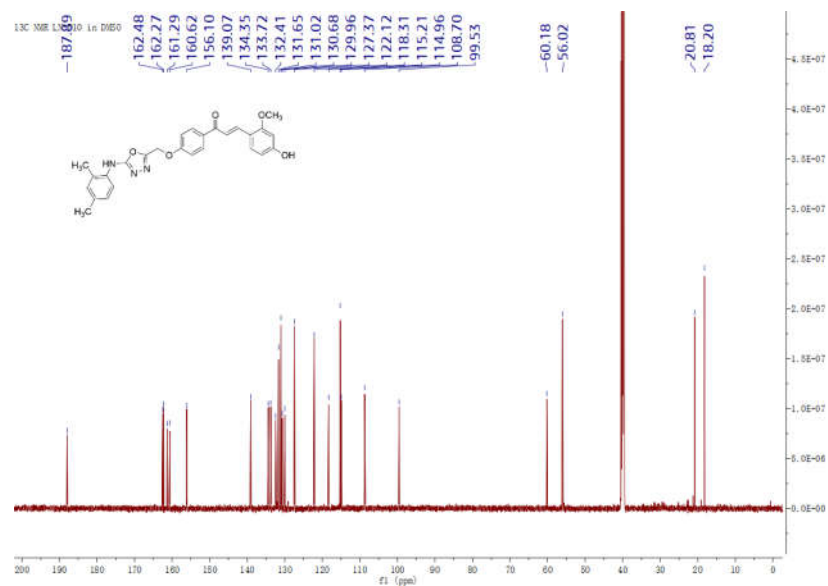

Figure S46. <sup>13</sup>C NMR (150 MHz, DMSO-*d*<sub>6</sub>) spectrum of compound T15

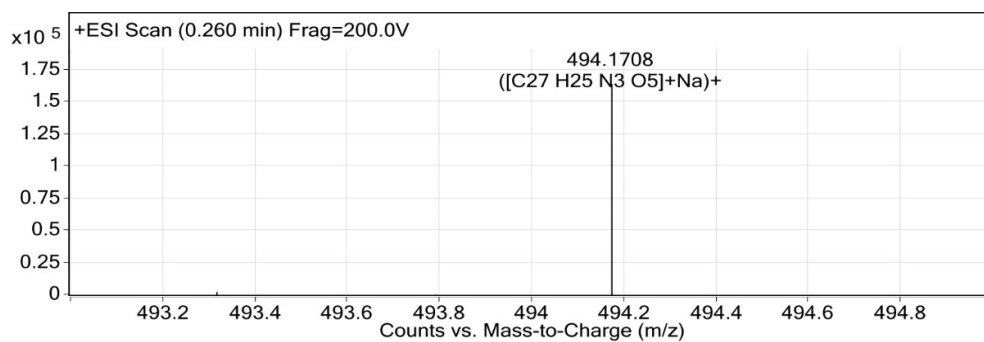

Figure S47. Mass spectrum of compound T15

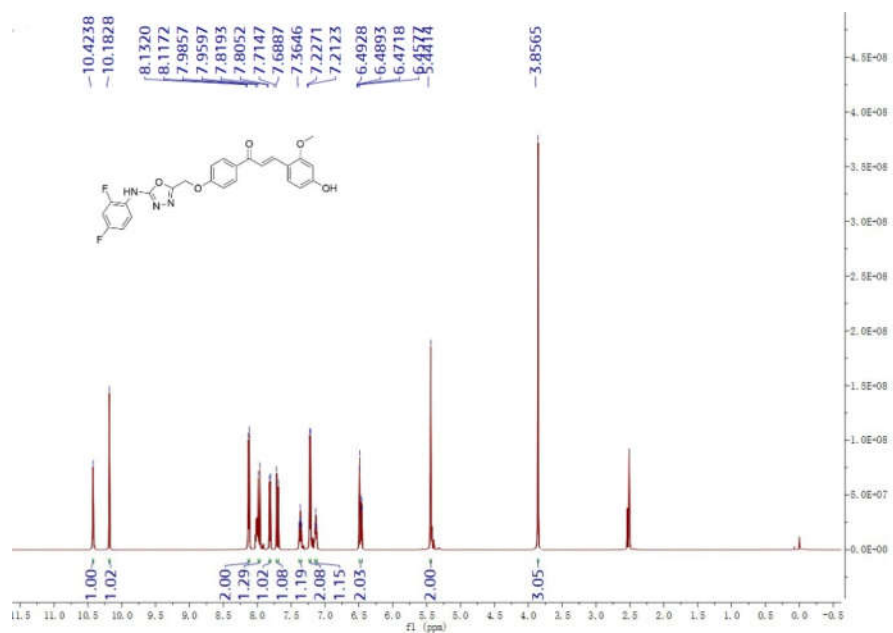

Figure S48. <sup>1</sup>H NMR (600 MHz, DMSO-*d*<sub>6</sub>) spectrum of compound T16

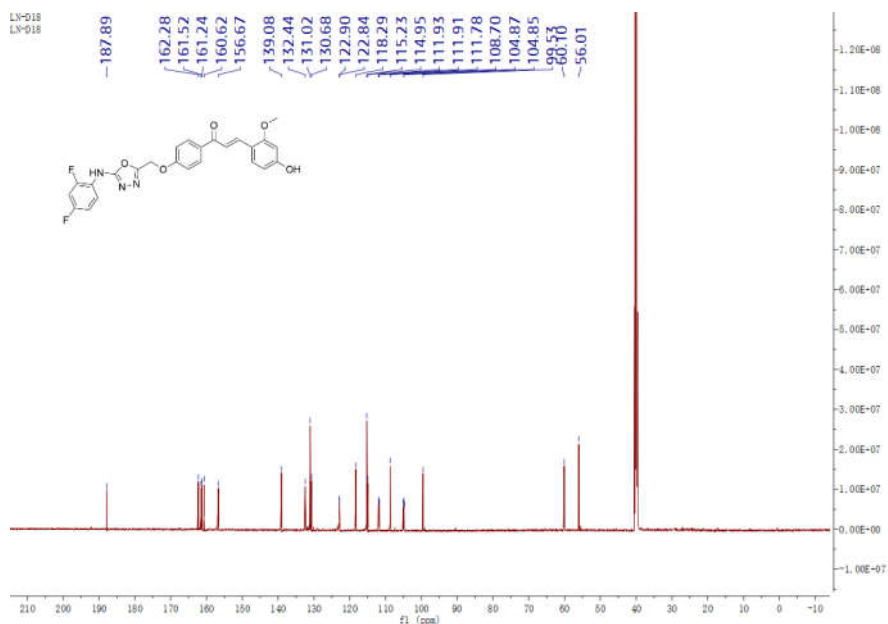

Figure S49. <sup>13</sup>C NMR (150 MHz, DMSO-*d*<sub>6</sub>) spectrum of compound T16

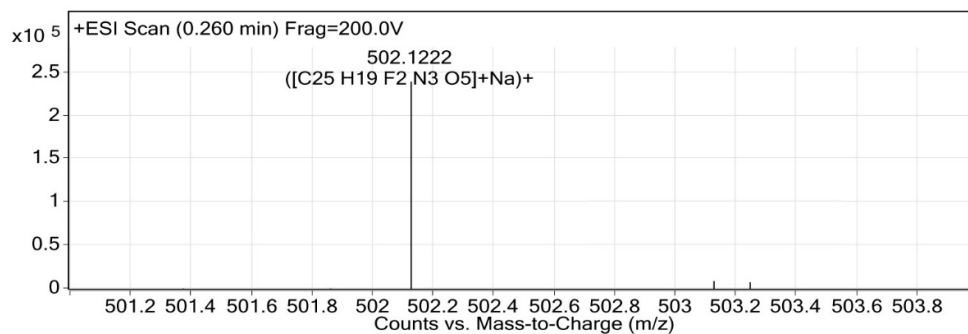

Figure S50. Mass spectrum of compound T16

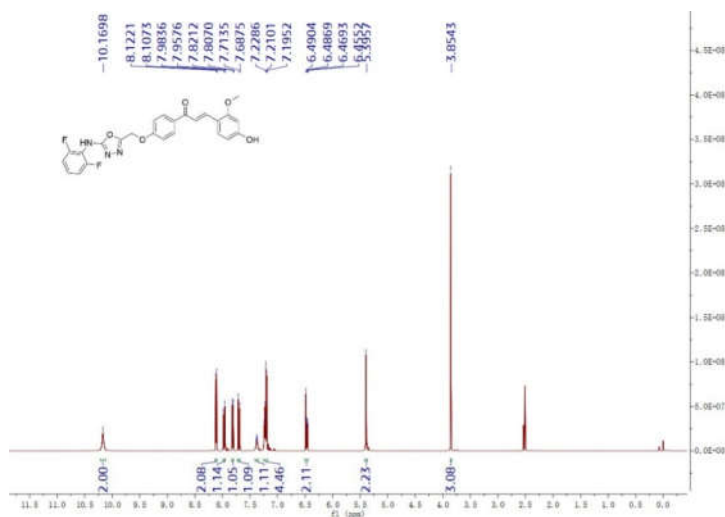

Figure S51. <sup>1</sup>H NMR (600 MHz, DMSO-*d*<sub>6</sub>) spectrum of compound T17

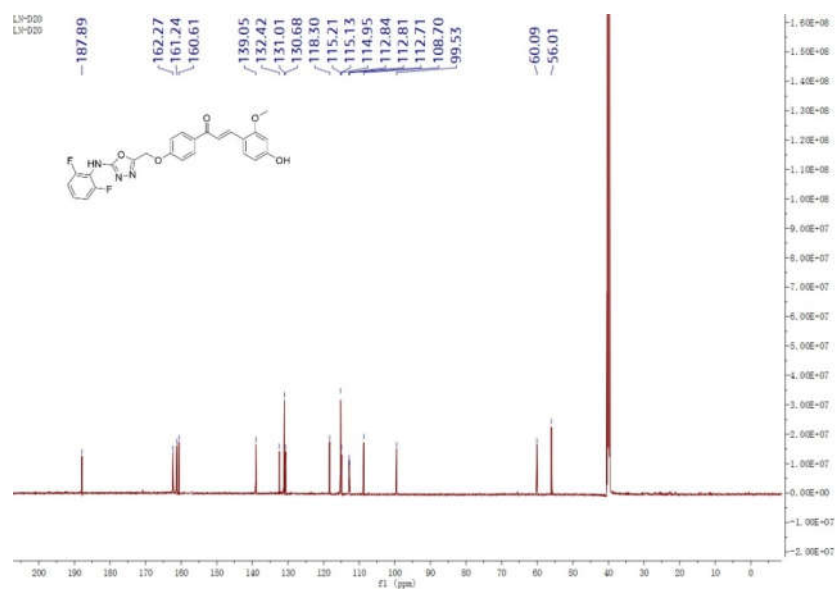

Figure S52. <sup>13</sup>C NMR (150 MHz, DMSO-*d*<sub>6</sub>) spectrum of compound T17

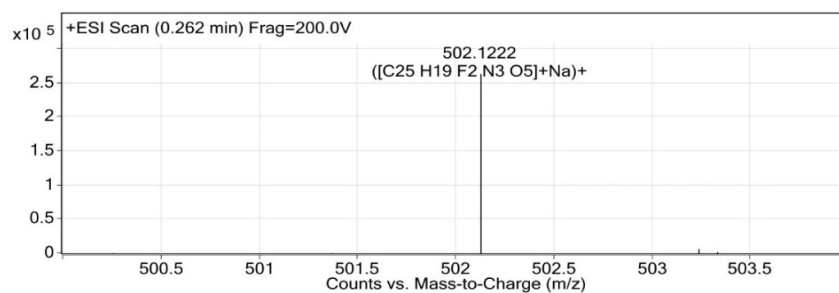

Figure S53. Mass spectrum of compound T17

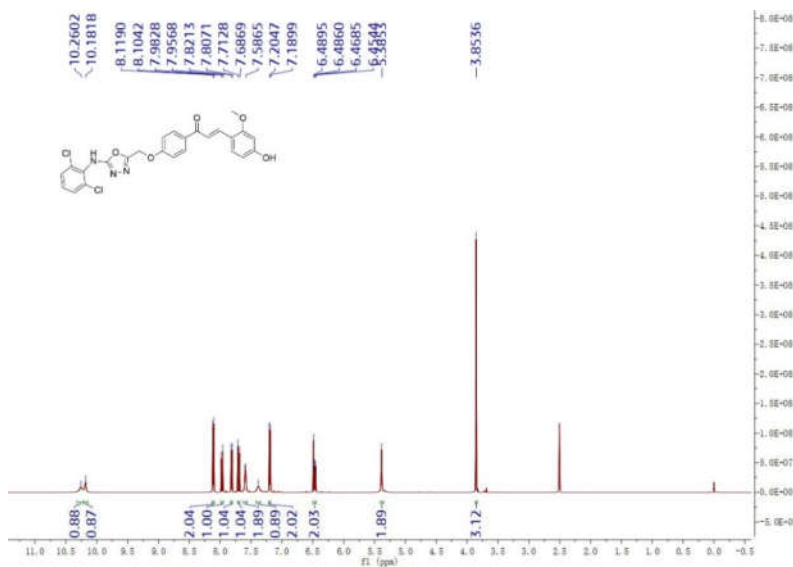

Figure S54. <sup>1</sup>H NMR (600 MHz, DMSO-*d*<sub>6</sub>) spectrum of compound T18

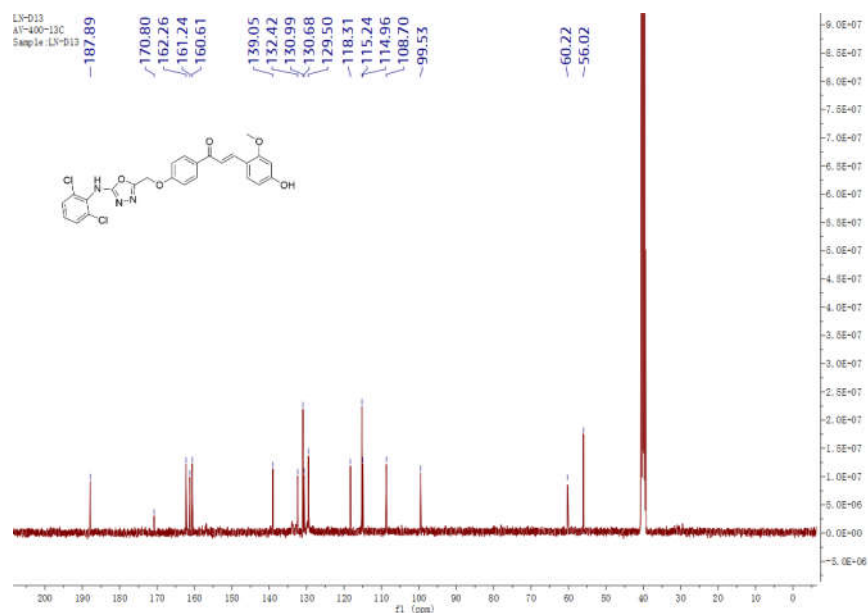

**Figure S55.**  $^{13}\text{C}$  NMR (150 MHz,  $\text{DMSO-}d_6$ ) spectrum of compound 18

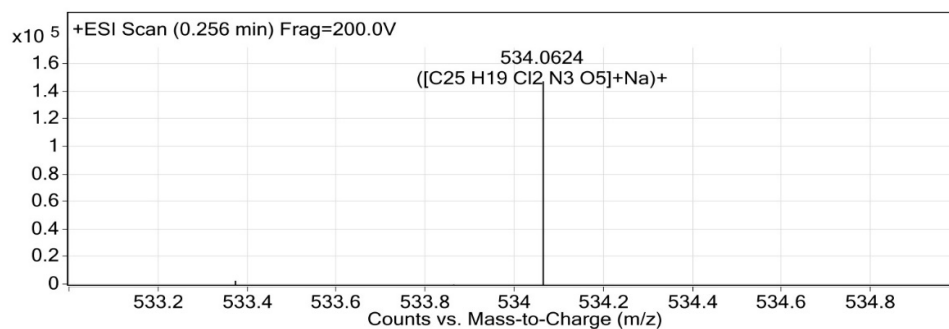

**Figure S56.** Mass spectrum of compound T18
